# Supplementary material
Source: Springer Nature journal article supplement (https://www.springermedizin.de/resource/supplementary/12943_2010_718_MOESM8_ESM.pdf/9554650)

**A**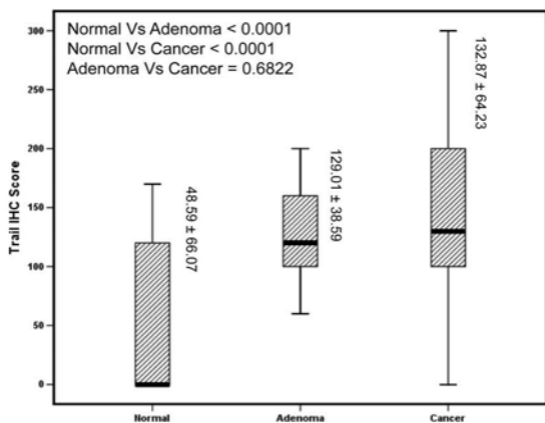**B**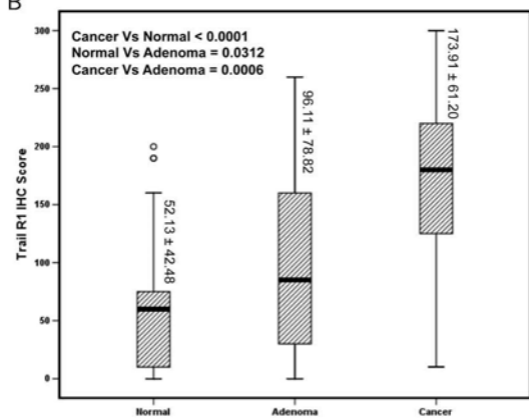**C**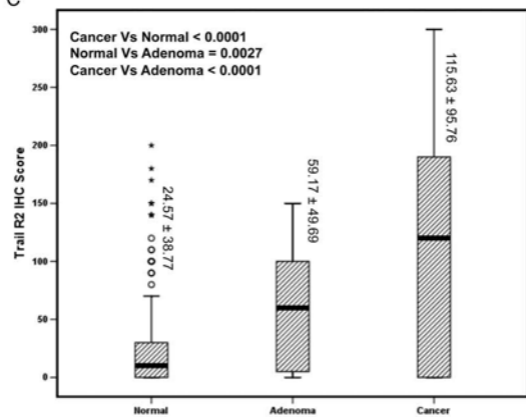

Supplement: MOESM8 [file 9554650]
